# Supplementary figures and images for: APbx1-dependent genetic and transcriptional network regulates spleen ontogeny
Source: Oxford University Press journal article supplement (doi:10.1242/dev.01884), 2005-06-08

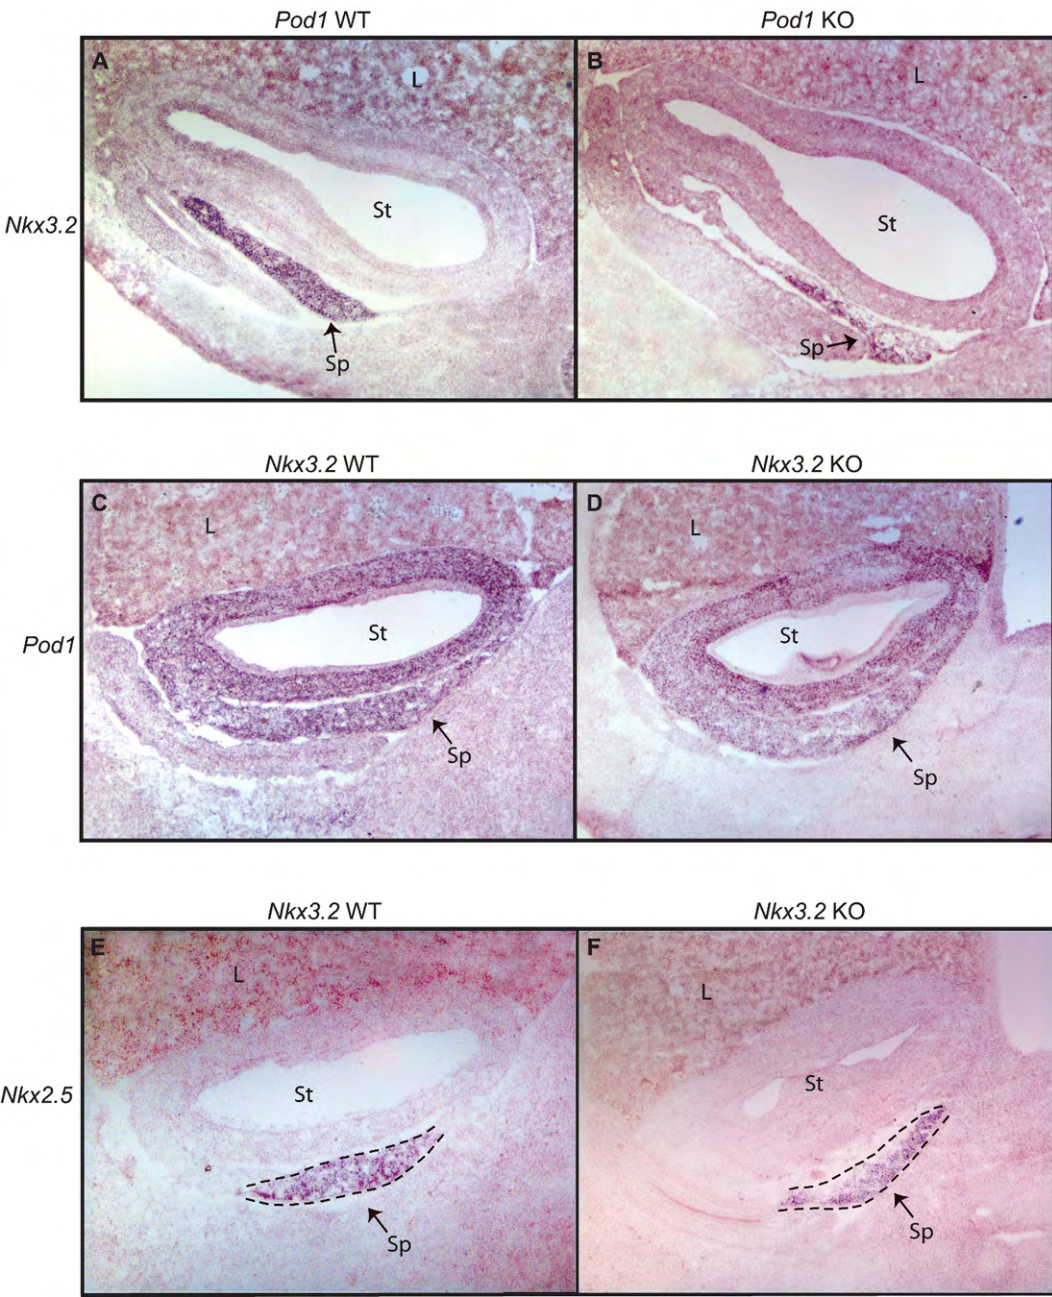

Supplement: dev01884-sup-figs1.pdf [file dev01884-sup-figs1.pdf]
